# Supplementary material
Source: PubMed Central journal article supplement (PMC10320434)
Supplement: NIHMS1910543-supplement-1.pdf [file NIHMS1910543-supplement-1.pdf]

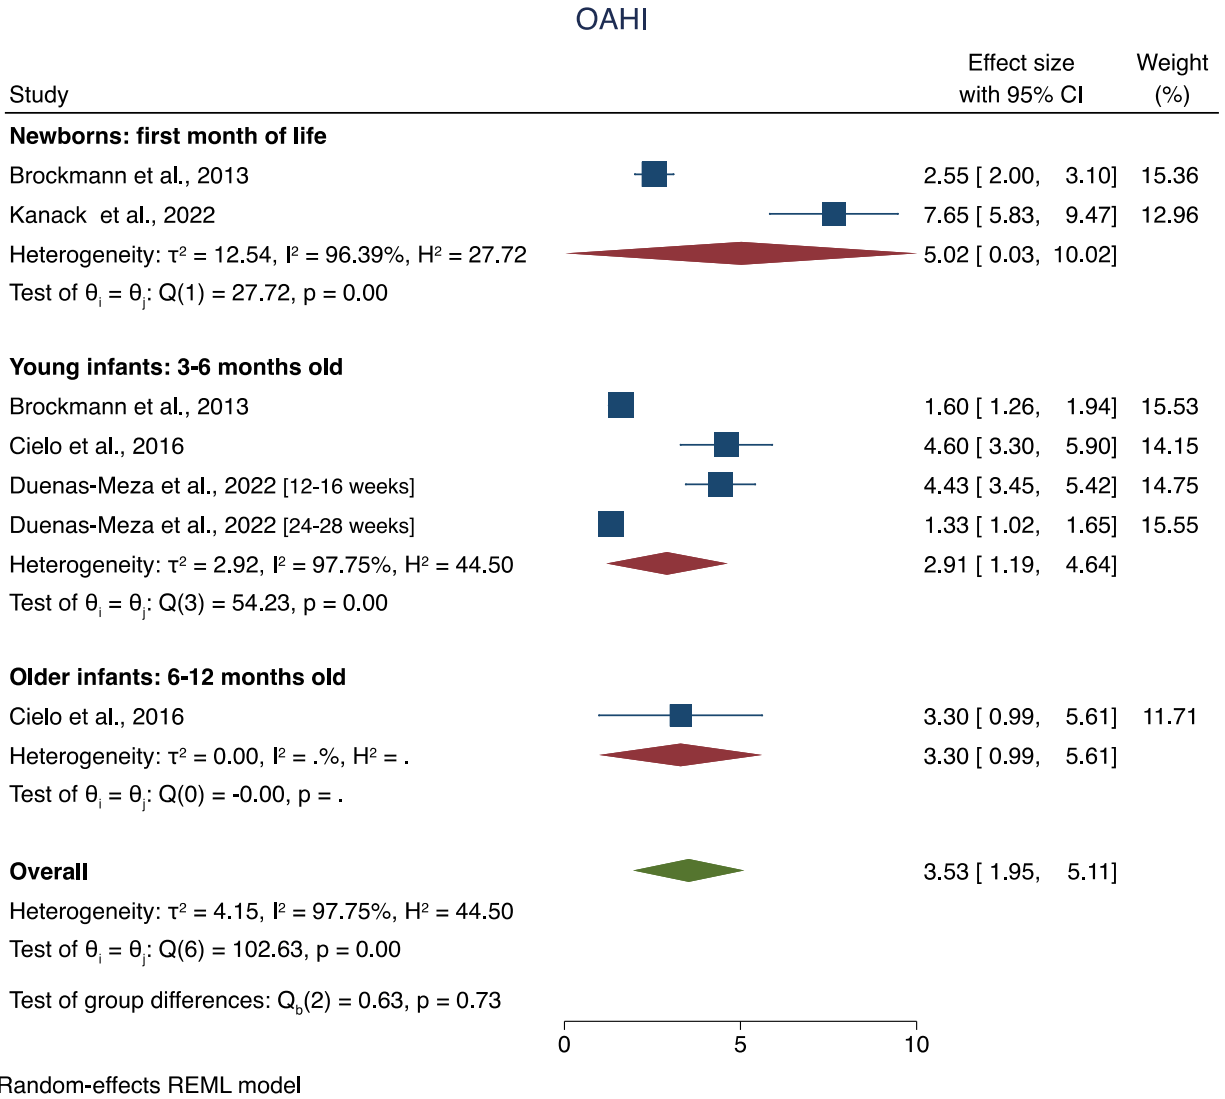

**Supplemental Figure 1.** Forest plot of overall and per group mean of obstructive apnea hypopnea index (OAHI).

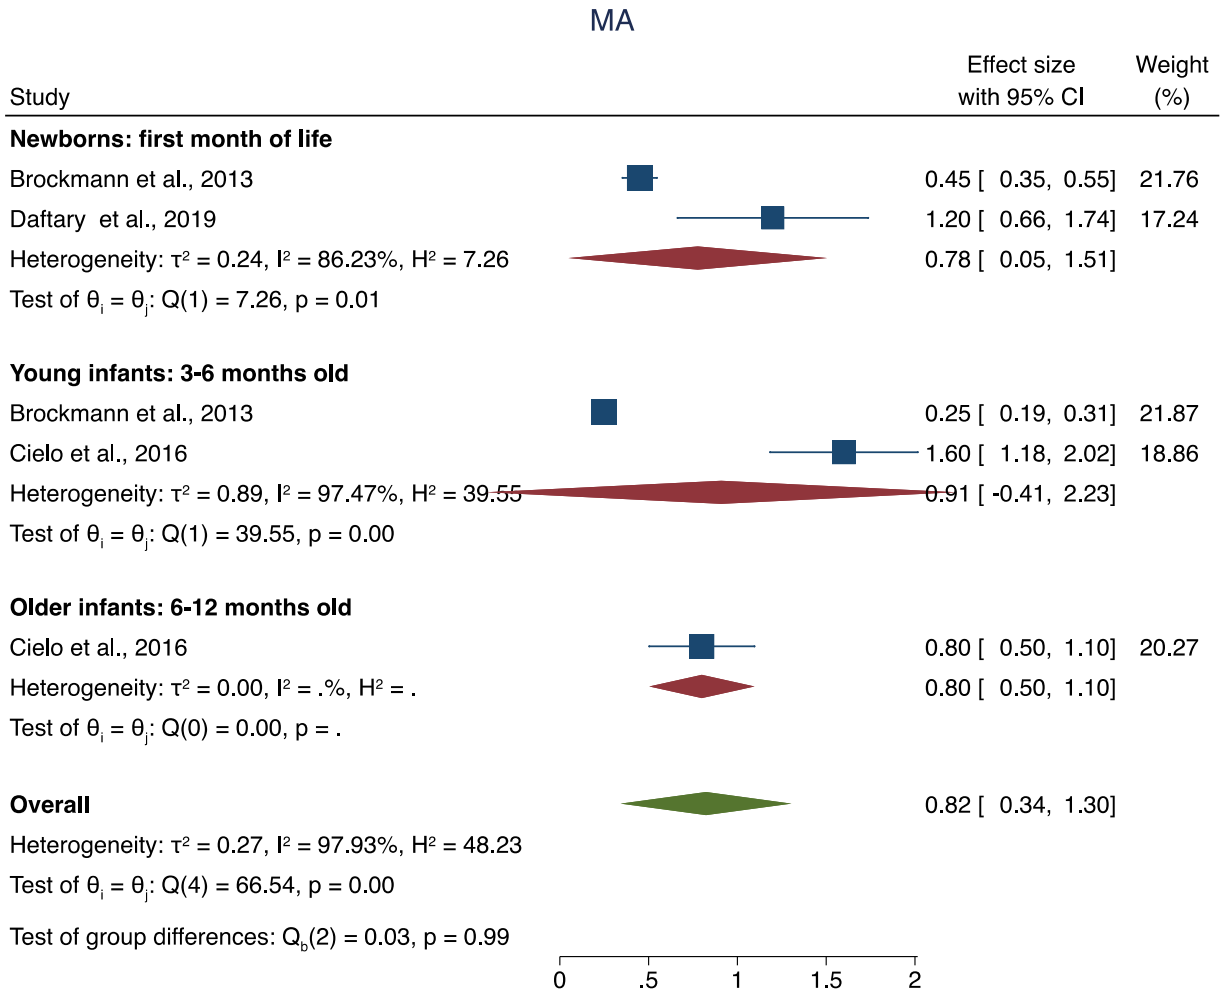

Random-effects REML model

**Supplemental Figure 2.** Forest plot of overall and per group mean of mixed apnea (MA) index.

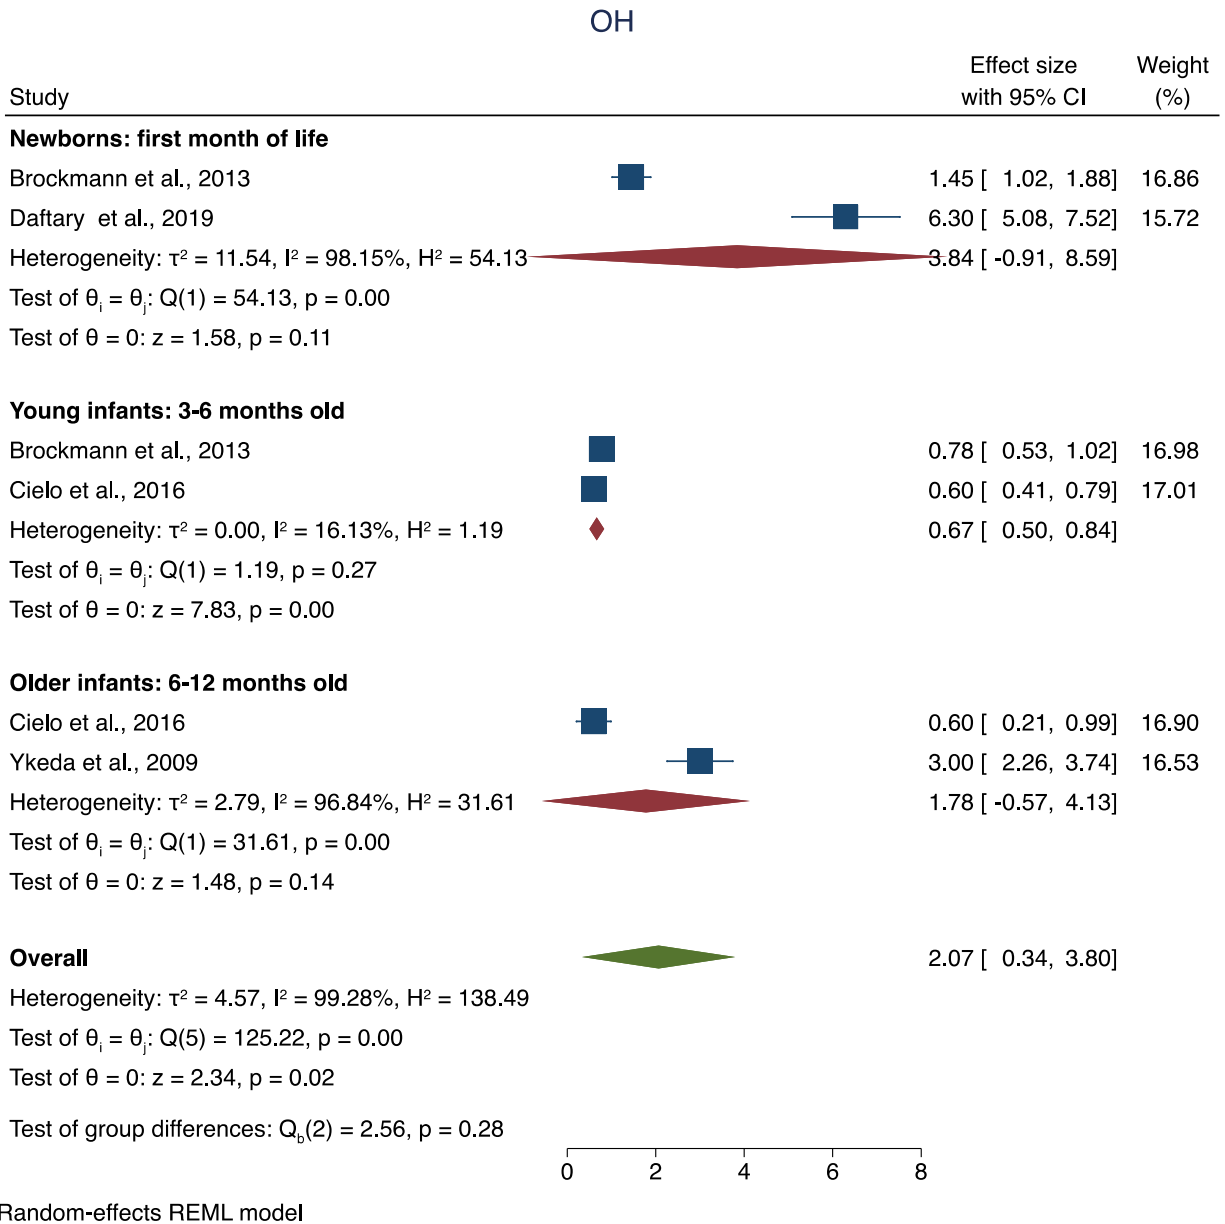

**Supplemental Figure 3.** Forest plot of overall and group mean of obstructive hypopnea (OH) index.

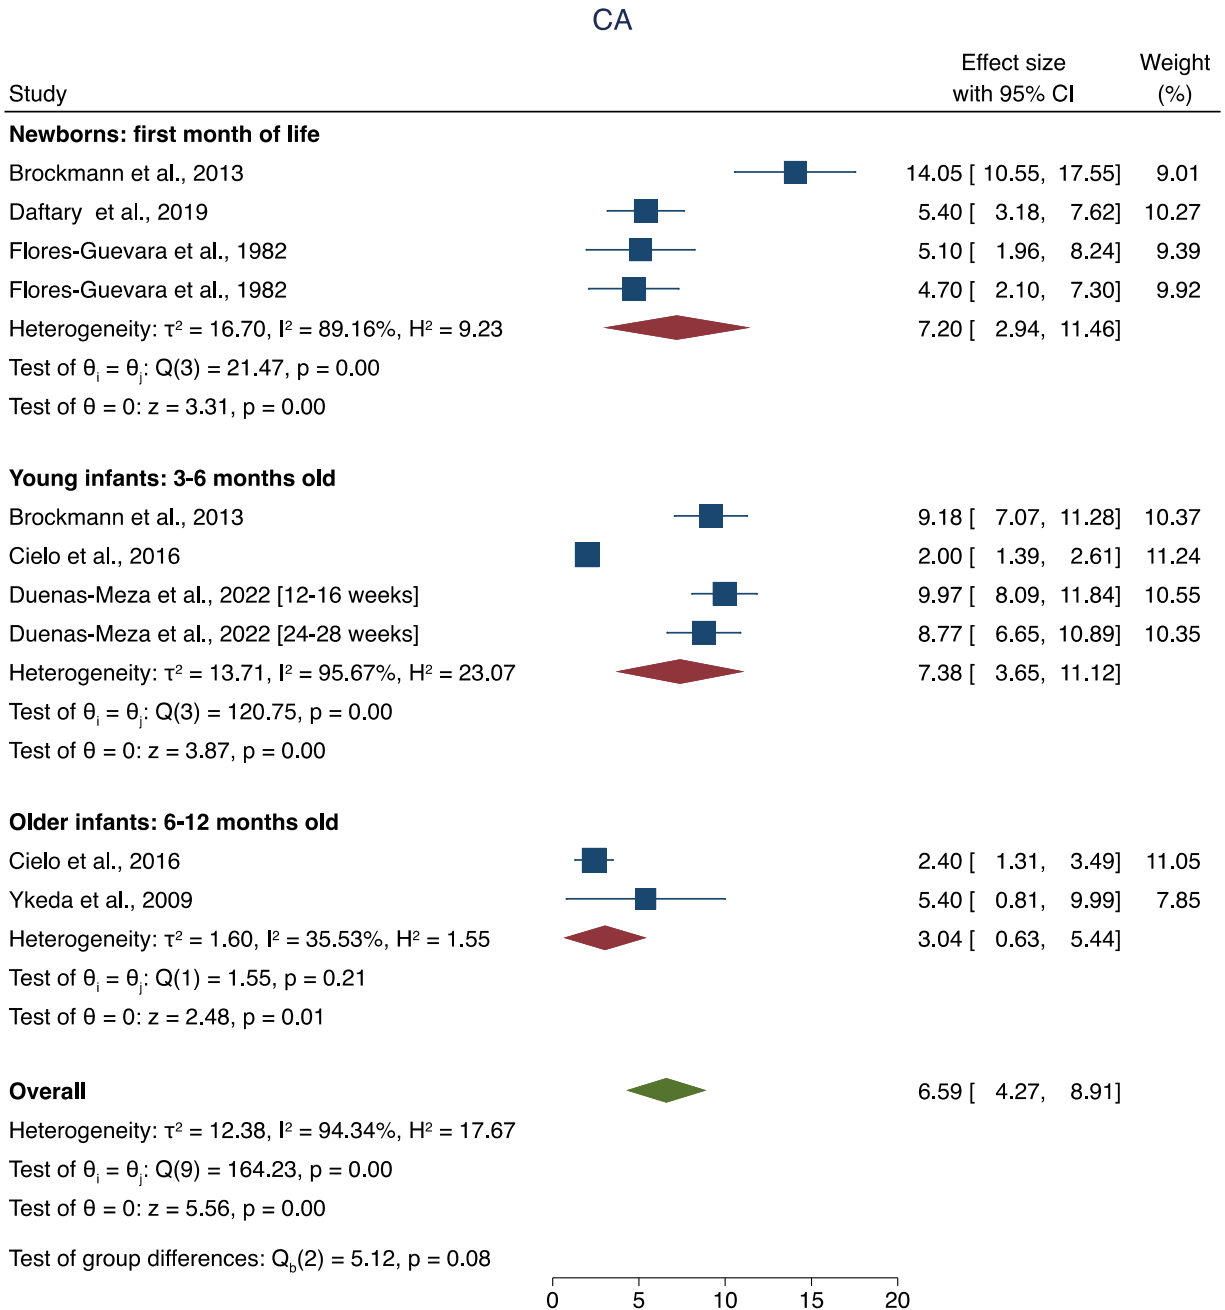

Random-effects REML model

**Supplemental Figure 4.** Forest plot of overall and group mean of central apnea (CA) index.

OA

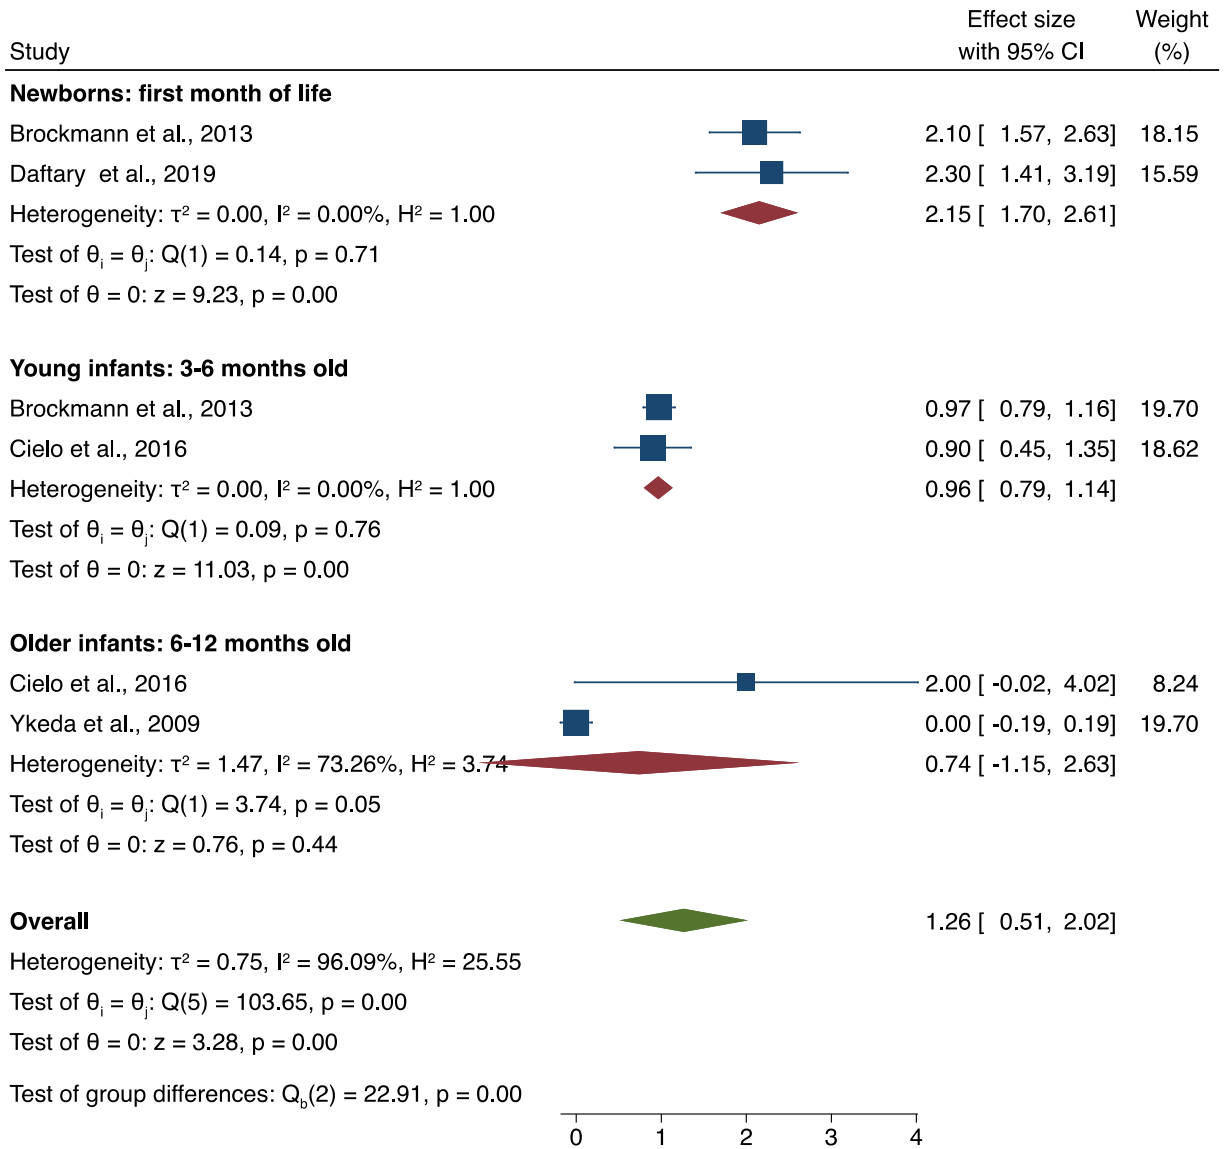

Random-effects REML model

**Supplemental Figure 5.** Forest plot of overall and group mean of obstructive apnea (OA) index.

mean saturation

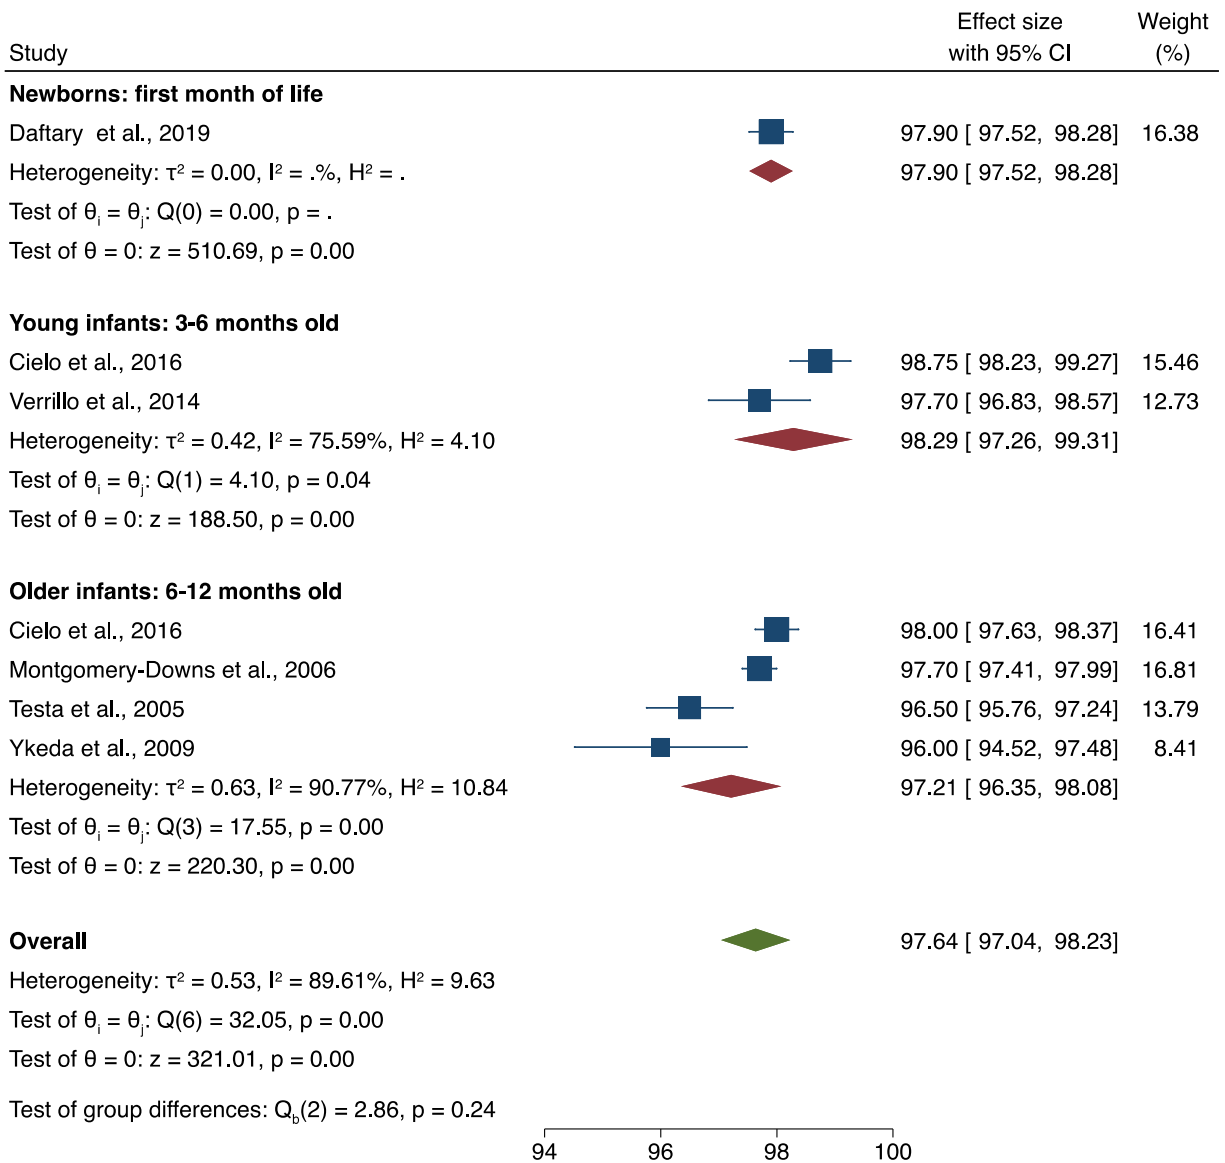

Random-effects REML model

**Supplemental Figure 6.** Forest plot of overall and group mean of mean oxyhemoglobin saturation.

Proportion of sleep time with SpO<sub>2</sub><90 (%)

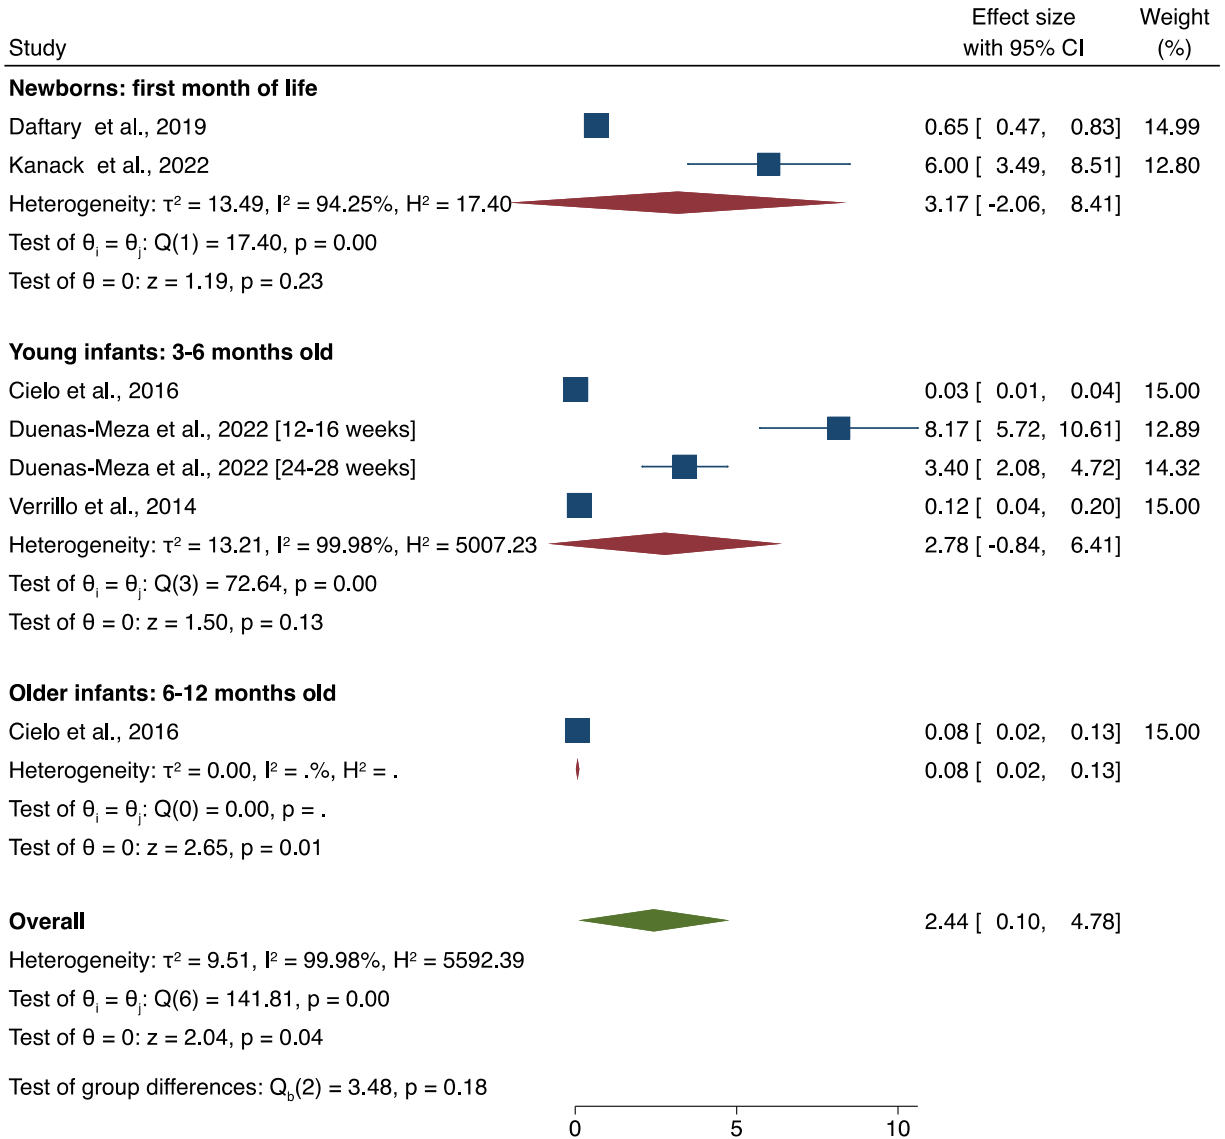

Random-effects REML model

**Supplemental Figure 7.** Forest plot of overall and group mean of proportion of total sleep time with oxyhemoglobin saturation (SpO<sub>2</sub>) less than 90%.
